# Supplementary material
Source: PubMed Central journal article supplement (PMC2797156)
Supplement: supp_M109.070219_jbc.M109.070219-1.pdf [file supp_M109.070219_jbc.M109.070219-1.pdf]

## Supplemental Data

*Generation of A. fumigatus mutant strains.*

*Generation of the  $\Delta glfB$  mutant.* The 5' and 3' flanking regions (1.5 kb each) of *A. fumigatus glfB* coding sequence were amplified from genomic DNA by PCR with primers JE15/JE14 and JE20/JE17 respectively and linked by fusion PCR to a *ble/tk* cassette conferring resistance to phleomycin (47) amplified by JE06/JE07. From this construct, a second PCR (JE18/JE19) yielded the final deletion construct. Sequence integrity was verified after cloning into pCR2.1-TOPO (Invitrogen). Polyethylene glycol mediated fusion of protoplasts was carried out as described in (34). Transformants were grown on AMM plates containing 1.2 M sorbitol as osmotic stabilizer under appropriate selection conditions and singled out twice before further analysis. Accurate gene deletion and reconstitution were confirmed by southern hybridization. Southern probes were amplified from genomic DNA using primer pairs JE21/JE22, JE25/JE24 and PS20/PS21. All primer sequences are provided in Suppl Table 1.

*Transient complementation of the  $\Delta glfB$  mutant.* A truncated *A. nidulans gpdA* promoter (24) and the *trpC* terminator were amplified from pSK342 (S. Krappmann, unpublished) with primers JE37/38 and JE39/40, respectively. The products were fused by PCR and cloned via *Xma*I in the pPTRII vector (Takara). Insertion of the *glfB* coding sequence (JE 46/47) via *Sfi*II yielded the non-integrative *A. fumigatus* expression plasmid pPTRII-*glfB* conferring resistance to pyrithiamine. Transformation of the  $\Delta glfB$  mutant strain with pPTRII-*glfB* was carried out as described above. Transformants were grown on AMM plates containing 30  $\mu$ g/ml phleomycin and 0,3  $\mu$ g/ml pyrithiamine. For Western Blot analysis, transformant mycelium was picked from the plates and processed as described in Material and Methods.

*Generation of A. fumigatus FLAG-glfB mutant.* To restore the *A. fumigatus* wild type from the  $\Delta glfB$  mutant strain, the full-length *gpdA* promoter and the *trpC* terminator were amplified from pME2891 (47) with primers JE103/104 and JE109/110 respectively, and N-terminally FLAG-tagged *glfB* cDNA with primers JE105/106 from pYEScupFLAG-*glfB*. Fragments were fused by overlap PCR and the  $\Delta glfB$  mutant was transformed as described above. Transformants were grown on AMM plates containing 100  $\mu$ M FUDR, and singled out twice. A 7.4 kb DNA fragment covering the whole *glfB* locus was amplified from genomic DNA of the FLAG-*glfB* strain with primers JE15/17 and sequenced to verify the integrity of the FLAG-*glfB* genomic locus.

### Suppl Table 1 DNA primer sequences

| Primer | Sequence (5' -3'), restriction sites underlined                        | Description (restriction site)                                                             |
|--------|------------------------------------------------------------------------|--------------------------------------------------------------------------------------------|
| JE06   | TCGAGATCTTTTCGACACTG                                                   | forward primer <i>ble/tk</i> cassette                                                      |
| JE07   | CTAGAAAGAAGGATTACCTC                                                   | reverse primer <i>ble/tk</i> cassette                                                      |
| JE14   | TCGACGTATTTTCAGTGTCTCGAAAGATCTCGATGTGAAGAGTTGACTCTGGT                  | reverse primer 5' flanking region<br>+30 nt <i>ble/tk</i> cassette overlap                 |
| JE15   | GATGGAGAGTACGTATAACG                                                   | forward primer 5' flanking region                                                          |
| JE17   | CGAAACTGTTGCGTTCTGTCC                                                  | reverse primer 3' flanking region                                                          |
| JE18   | CAAGCTAGAGTAACCTGTCTGAT                                                | forward primer nested PCR                                                                  |
| JE19   | TATCCTTCGACGCTTCACTG                                                   | reverse primer nested PCR                                                                  |
| JE20   | CAC TTGTTTAGAGGTAATCCTTCTTTCTAGGCTGGAATGCGTAAAGAAAATG                  | forward primer 3' flanking region<br>+30 nt <i>ble/tk</i> cassette overlap                 |
| JE21   | CTCCGTCCGGTAGATAGGCACTGG                                               | forward primer Southern Blot probe 1                                                       |
| JE22   | GCCCGAAAATCAGACAAGCAGAGA                                               | reverse primer Southern Blot probe 1                                                       |
| JE24   | CCGGTGCGAGGATTGATAAGTGTC                                               | reverse primer Southern Blot probe 2                                                       |
| JE25   | CGGATTCACCTCTTAACCACCTTC                                               | forward primer Southern Blot probe 2                                                       |
| JE26   | GCAAGGATCCAGTAACGAAGGAGAAAAAGCC                                        | forward primer <i>glfB</i> cDNA (BamHI)                                                    |
| JE28   | CGAGTCTAGATTACGCATTCCCAGCAGT                                           | reverse primer <i>glfB</i> cDNA (XbaI)                                                     |
| JE37   | GCAACCCGGGTTTGCCCGGTGTATGAAACC                                         | forward primer truncated <i>gpdA</i> promoter (XmaI)                                       |
| JE38   | GGTGATGTCTGCTCAAGCGG                                                   | reverse primer truncated <i>gpdA</i> promoter                                              |
| JE39   | CCGCTTGAGCAGACATCACCGGCCACGTTGGCCTGACAGGCCGATCCACTT<br>AACGTTACTGAAATC | forward primer <i>trpC</i> terminator<br>(2 <i>SfiI</i> -sites) +20 nt <i>gpdA</i> overlap |
| JE40   | GCAACCCGGGAAAAGAAGGATTACCTCTAAACAAG                                    | reverse primer <i>trpC</i> terminator<br>(XmaI)                                            |
| JE46   | GCAAGGCCACGTTGGCCATGAGTAACGAAGGAGAAAAAGCC                              | forward primer <i>glfB</i> cDNA ( <i>SfiI</i> )                                            |
| JE47   | GCAAGGCCCTGTCAGGCCCTCAGTGGTGGTGGTGGTGGTCTCGAGCGCATT<br>CCCAGCAGTTGC    | reverse primer <i>glfB</i> cDNA + His-tag<br>( <i>SfiI</i> , <i>XhoI</i> )                 |
| JE103  | CTAGAAGCTTTTCGAGATCTTTTCGACACTG                                        | forward primer full-length <i>gpdA</i> promoter ( <i>HindIII</i> )                         |
| JE104  | CGTCATCGTCCTTG TAGTCCATGGTGATGTCTGCTCAAGCGG                            | reverse primer full-length <i>gpdA</i> Promotor +22 nt FLAG-tag overlap                    |
| JE105  | ATGGACTACAAGGACGATGACGATAAGGTACCAGGATCCAGTAACGAAGGA<br>GAAAAAGCC       | forward primer for <i>glfB</i> cDNA<br>+FLAG-tag sequence                                  |
| JE106  | CTAGGGCCTGTCTAGGCCCTTACGCATTCCCAGCAGT                                  | reverse primer for <i>glfB</i> cDNA ( <i>SfiI</i> )                                        |
| JE109  | AAGGCCTGACAGGCCCTAGGATCCACTTAACGTTACTGAAATC                            | forward primer <i>trpC</i> +20 nt JE106 overlap                                            |
| JE110  | GAAAGAAGGATTACCTCTAAACAAG                                              | reverse primer <i>trpC</i> terminator                                                      |
| PS20   | AAGGTCGTTGCGTCAGTCCA                                                   | forward primer Southern Blot probe 3                                                       |
| PS21   | TCGATGTGTCTGTCCTCC                                                     | reverse primer Southern Blot probe 3                                                       |

**Suppl Table 2** *Aspergillus fumigatus* (Af293) nucleotide sugar transporter candidates. The number of transmembrane domains (TMDs) predicted by ConPredII (<http://bioinfo.si.hirosaki-u.ac.jp/~ConPred2/>) is given, together with family classification according to the TC system (<http://www.tcdb.org>) and putative substrates.

| Acc. No.  | Description in the RefSeq Database          | Locus Tag    | TMDs | TC #     | TC Subfamily                                        | Possible Substrate   |
|-----------|---------------------------------------------|--------------|------|----------|-----------------------------------------------------|----------------------|
| XP_750355 | nucleotide-sugar transporter                | AFUA_1G06050 | 8    | 2.A.7    | No subfamily yet                                    |                      |
| XP_752298 | DUF6 domain protein                         | AFUA_1G09310 | 9    | 2.A.7    | No subfamily yet                                    |                      |
| XP_756111 | integral membrane protein                   | AFUA_2G17760 | 9    | 2.A.7    | No subfamily yet                                    |                      |
| XP_754351 | DUF250 domain membrane protein (GlfB)       | AFUA_3G12700 | 11   | 2.A.7    | No subfamily yet                                    | UDP-Galf             |
| XP_750700 | nucleotide-sugar transporter                | AFUA_6G08100 | 10   | 2.A.7    | No subfamily yet                                    |                      |
| XP_747139 | solute transporter                          | AFUA_8G00660 | 8    | 2.A.7    | No subfamily yet                                    |                      |
| XP_747138 | integral membrane protein                   | AFUA_8G00670 | 9    | 2.A.7    | No subfamily yet                                    |                      |
| XP_753855 | DUF914 domain membrane protein              | AFUA_5G07810 | 10   | 2.A.7    | No subfamily yet                                    |                      |
| XP_747907 | ER to Golgi transport protein (Sly41)       | AFUA_5G04360 | 8    | 2.A.7.9  | Triose-phosphate Transporter (TPT) Family           |                      |
| XP_746924 | UDP-GlcNAc transporter (Mnn2-2)             | AFUA_8G02830 | 9    | 2.A.7.10 | UDP-N-Acetylglucosamine:UMP Antiporter (UAA) Family | UDP-GlcNAc           |
| XP_750293 | UDP-Glc/Gal ER nucleotide sugar transporter | AFUA_1G05440 | 10   | 2.A.7.11 | UDP-Galactose:UMP Antiporter (UGA) Family           | UDP-Gal, PAPS        |
| XP_751184 | UDP-galactose transporter                   | AFUA_6G13070 | 7    | 2.A.7.12 | CMP-Sialate:UMP Antiporter (CSA) Family             | UDP-Gal              |
| XP_746997 | nucleotide-sugar transporter                | AFUA_8G02090 | 5    | 2.A.7.12 | CMP-Sialate:UMP Antiporter (CSA) Family             | UDP-Gal              |
| XP_754058 | Golgi GDP-mannose transporter               | AFUA_5G05740 | 10   | 2.A.7.13 | GDP-Mannose:GMP Antiporter (GMA) Family             | GDP-Man              |
| XP_752704 | DUF6 domain protein                         | AFUA_1G13340 | 10   | 2.A.7.24 | Thiamine Pyrophosphate Transporter (TPPT) Family    | Thiamine derivatives |
| XP_753437 | integral membrane protein                   | AFUA_5G12140 | 9    | 2.A.7.24 | Thiamine Pyrophosphate Transporter (TPPT) Family    | Thiamine derivatives |

Suppl Figure 1

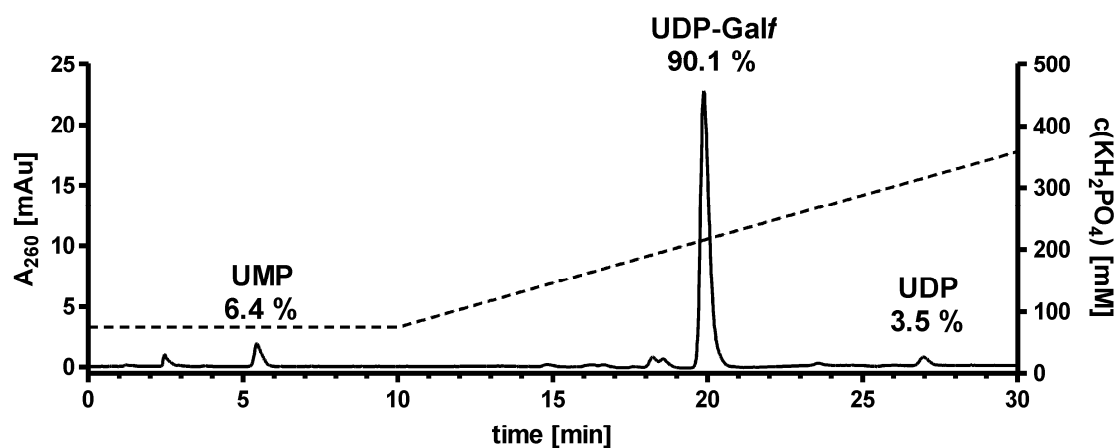

**Suppl Fig 1** UDP-Galf HPLC profile. 10  $\mu\text{l}$  of a 2 mM UDP-Galf solution were loaded on a CarboPac PA-100 column (Dionex) and eluted with a linear gradient of 75 to 500 mM  $\text{KH}_2\text{PO}_4$  (dashed line, flow rate 1 ml/min) (45). UMP and UDP were identified from retention times of genuine species, and UDP-Galf retention time was derived from (45). Peak area comparison (assuming identical extinction coefficients) yielded a UMP content of about 6-7 % in the UDP-Galf preparation used in our study.

Suppl Figure 2

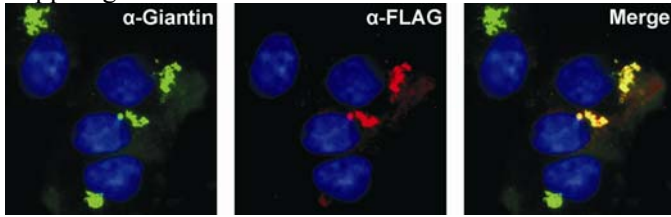

**Suppl Fig 2** Transient *glfB* expression in HEK293 cells. A HindIII/XbaI fragment was subcloned from pYEScup-FLAG-glfB in pcDNA4 (Invitrogen) to yield pcDNA4-FLAG-glfB. HEK293 cells transfected with pcDNA4-FLAG-glfB were grown on glass coverslips for 48 h without selection. For immunofluorescence stainings, cells were fixed in 4 % paraformaldehyde/PBS and permeabilized with 0.1 % of a *Quillaja saponaria* saponin mixture (Sigma) in PBS containing 0.1 % BSA. Cells were incubated with mouse anti-Flag M5 mAb (Sigma, F4042) and rabbit anti-giantin serum (Golgi marker; Covance, PRB-114C) for 90 min at room temperature. After three washings (0.1 % BSA and 0.1 % Tween-20 in PBS), cells were incubated with secondary antibody conjugates anti-mouse Ig-Cy3 (Sigma, C2181) and anti-rabbit IgG-Alexa Fluor 488 (Molecular Probes, # A21206) for 1 h at room temperature. Cells were stained with the nuclear dye (Hoechst 33258; Hoechst Pharmaceuticals), and after washing with water, slides were mounted (Dako) and analyzed under a microscope (Axiovert 200M; Carl Zeiss, Inc.) using a Plan Apochromat 63×/1.40 oil differential interference contrast objective (M27; Carl Zeiss, Inc.) at room temperature. Images were taken using a camera (AxioCam MRm; Carl Zeiss, Inc.) with filter sets for Hoechst 33258, Alexa Fluor 488, and Cy3 which were converted in blue, green, and red, respectively by Axiovision 4.4 software (Carl Zeiss, Inc.).
